# Supplementary material for: Effect of Climate on Bacterial and Archaeal Diversity of Moroccan Marine Microbiota
Source: MDPI journal article supplement (doi:10.3390/microorganisms10081622), 2022-08-10
Supplement: s1 [file s1]

## SAMPLE HANDLING SHEET FOR A SEA WATER SAMPLE

Date: — — — / — — — / — — —

### Sample Identification

Time of sampling:

Laboratory time arrival:

ID:

Water temperature:

Environment temperature:

### Sample origin

Nature of sampled water:

Sampling point:

State:

Region:

Localization in relation to a well,  
spring, river, water treatment plant...:

Sampling conditions:

### Physical apparence :

Color:

Aspect:

Smell:

Turbidity:

Remarks:

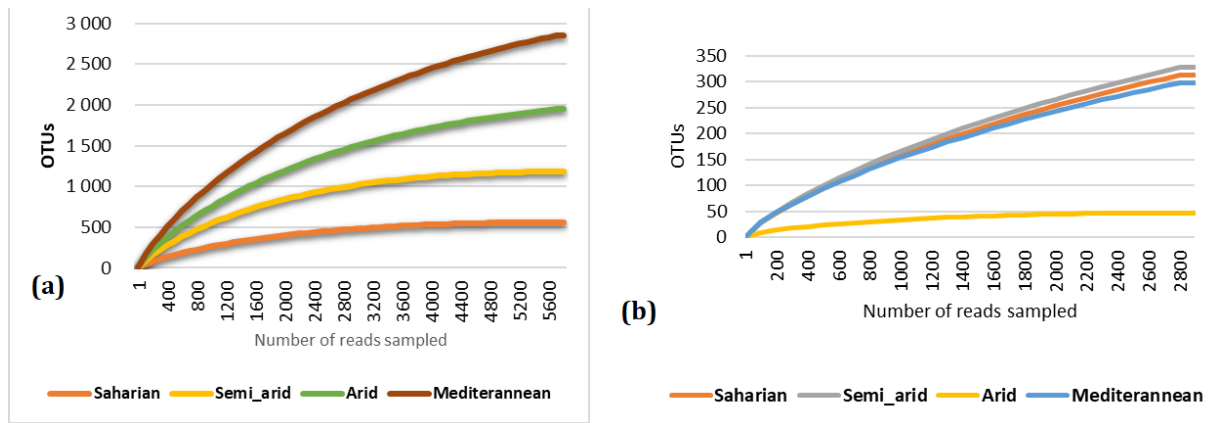

**Figure S1:** Rarefaction curves of bacterial OTUs (a) and archaeal OTUs (b) of the samples based on the 16SrRNA gene amplicon sequencing.

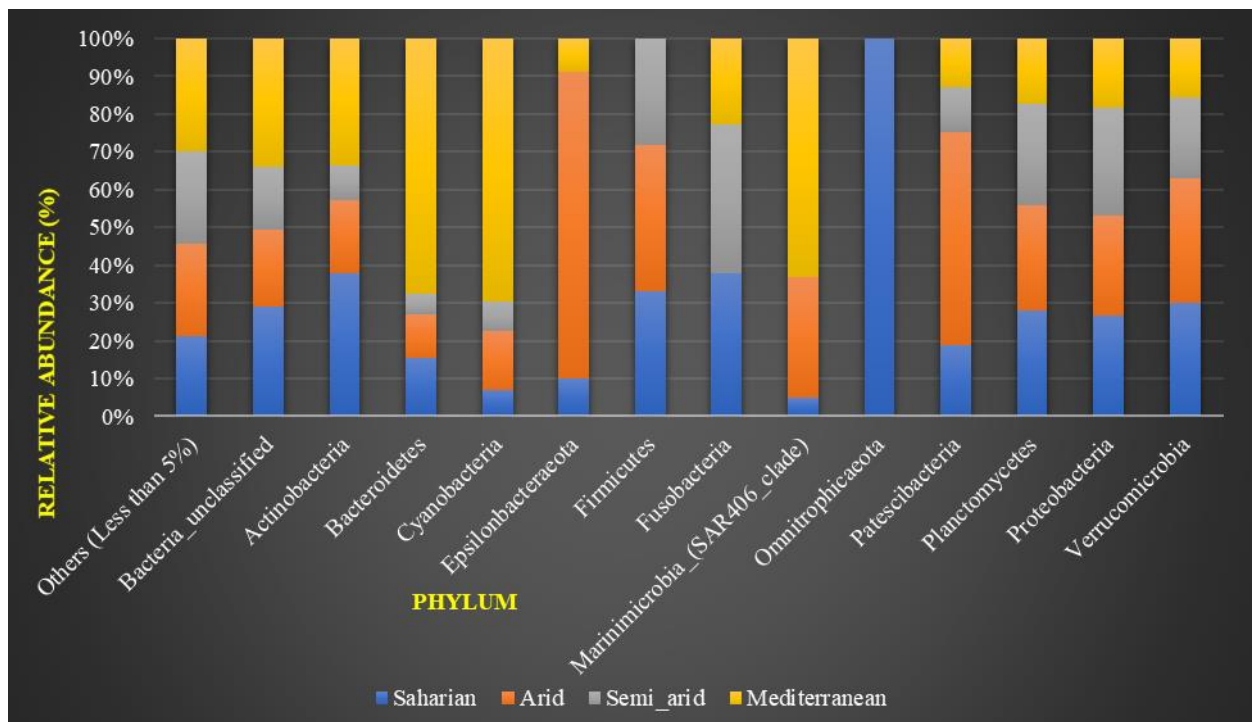

**Figure S2:** Distribution of the most abundant bacterial phyla based on 16S rRNA gene amplicon sequencing in the microlayer of marine waters. Phyla contributing to less than 5% to each sample are not involved.

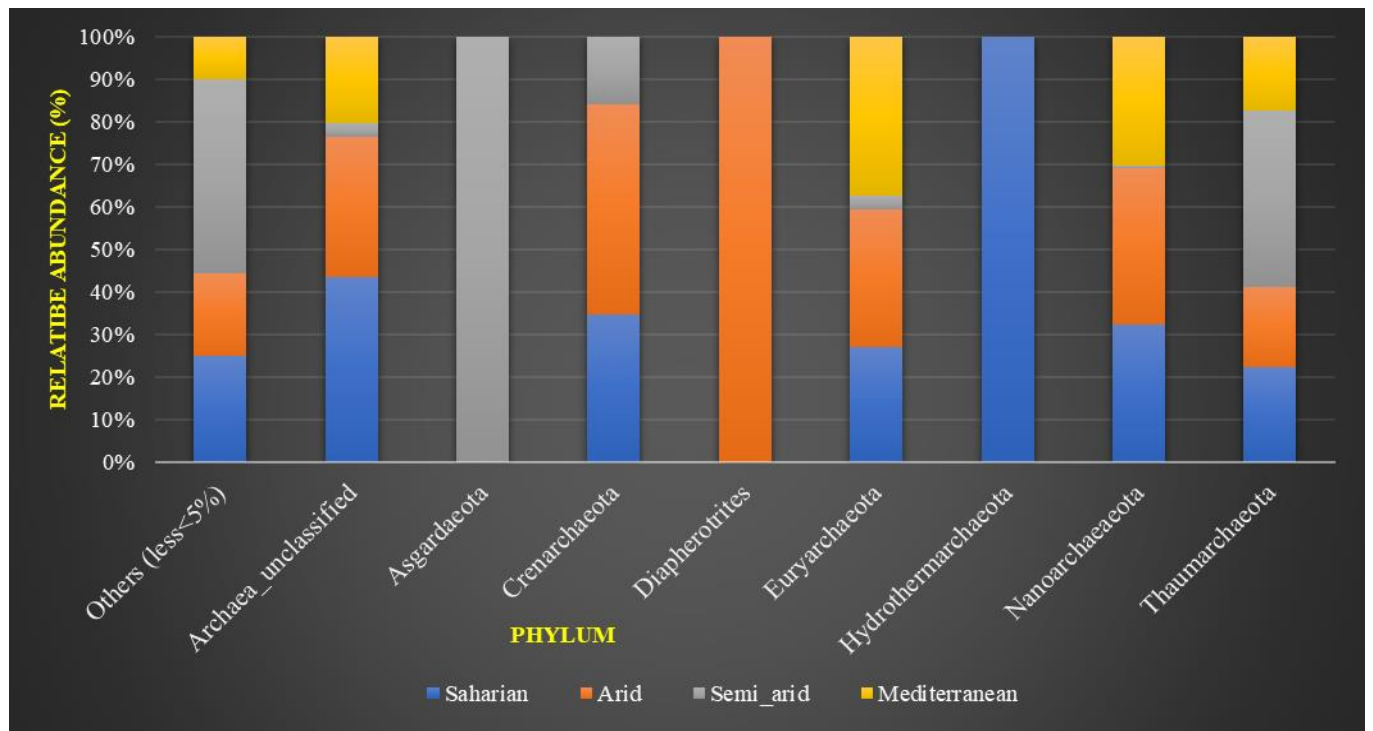

**Figure.S3:** Distribution of the most abundant archaeal phyla based on 16S rRNA gene amplicon sequencing in the surface microlayer of marine waters.
